# Supplementary material
Source: Research Square preprint supplement (doi:10.21203/rs.3.rs-9473635/v1)
Supplement: Supplementary file 1 [file bb80536e548b00af95a8cbc4.docx]

Supplementary Table 1 Participating centers of national survey

| **No.** | **Hospital** | **Province** |
| --- | --- | --- |
| 1 | Renji Hospital, Shanghai Jiao Tong University, School of Medicine | Shanghai |
| 2 | Shanghai Ninth People's Hospital, Shanghai Jiao Tong University School of Medicine | Shanghai |
| 3 | Changhai Hospital | Shanghai |
| 4 | Shanghai General Hospital | Shanghai |
| 5 | Peking Union Medical College Hospital | Beijing |
| 6 | Beijing Anzhen Hospital | Beijing |
| 7 | Daxing District People's Hospital | Beijing |
| 8 | Beijing Friendship Hospital | Beijing |
| 9 | Beijing Luhe Hospital | Beijing |
| 10 | Fuxing Hospital, Capital Medical University | Beijing |
| 11 | Chengdu First People's Hospital | Sichuan |
| 12 | West China Hospital, Sichuan University | Sichuan |
| 13 | Affiliated Hospital of North Sichuan Medical College | Sichuan |
| 14 | North District of Henan Provincial People's Hospital | Henan |
| 15 | Henan Provincial People's Hospital | Henan |
| 16 | Heyi District of the First Affiliated Hospital of Zhengzhou University | Henan |
| 17 | Zhengdong District of the First Affiliated Hospital of Zhengzhou University | Henan |
| 18 | South District of the First Affiliated Hospital of Zhengzhou University | Henan |
| 19 | The Fifth Affiliated Hospital of Zhengzhou University | Henan |
| 20 | Jianli People's Hospital | Hubei |
| 21 | Union Hospital, Tongji Medical College, Huazhong University of Science and Technology | Hubei |
| 22 | The First People's Hospital of Jingzhou | Hubei |
| 23 | Hebei General Hospital | Hebei |
| 24 | The Second Hospital of Hebei Medical University | Hebei |
| 25 | Union Hospital affiliated to Fujian Medical University | Fujian |
| 26 | Fujian Provincial Hospital | Fujian |
| 27 | Zhongshan Hospital affiliated to Xiamen University | Fujian |
| 28 | The First Affiliated Hospital of Nanchang University | Jiangxi |
| 29 | The Second Affiliated Hospital of Nanchang University | Jiangxi |
| 30 | Jiangxi Provincial People's Hospital | Jiangxi |
| 31 | The Second Affiliated Hospital of Soochow University | Jiangsu |
| 32 | Kunshan First People's Hospital | Jiangsu |
| 33 | Northern Jiangsu People's Hospital | Jiangsu |
| 34 | The First People's Hospital of Lianyungang | Jiangsu |
| 35 | The First People's Hospital of Suqian | Jiangsu |
| 36 | The First Affiliated Hospital of Soochow University | Jiangsu |
| 37 | Qingdao Central Hospital | Shandong |
| 38 | Weifang Yidu Central Hospital | Shandong |
| 39 | Qingdao Municipal Hospital | Shandong |
| 40 | Qingdao Haici Hospital | Shandong |
| 41 | Linyi Central Hospital | Shandong |
| 42 | Affiliated Hospital of Jining Medical University | Shandong |
| 43 | Jining First People's Hospital, Shandong Province | Shandong |
| 44 | Shandong Provincial Hospital | Shandong |
| 45 | The Affiliated Hospital of Guizhou Medical University | Guizhou |
| 46 | The Second People's Hospital of Yunnan Province | Yunnan |
| 47 | The First Affiliated Hospital of Chongqing Medical University | Chongqing |
| 48 | Ningbo No.2 Hospital | Zhejiang |
| 49 | Dongguan People's Hospital | Guangdong |
| 50 | The First Hospital of Changsha | Hunan |
| 51 | The Eighth Hospital of Changsha | Hunan |
